# Supplementary material for: Shikonin Inhibits Tumor Growth in Mice by Suppressing Pyruvate Kinase M2-mediated Aerobic Glycolysis
Source: PubMed Central journal article supplement (PMC6162216; doi:10.1038/s41598-018-31615-y), 2018-09-28

**Shikonin Inhibits Tumor Growth in Mice by Suppressing Pyruvate Kinase M2-mediated  
Aerobic Glycolysis**

Xiaoyue Zhao<sup>1†</sup>, Yanan Zhu<sup>2†</sup>, Jianhua Hu<sup>1</sup>, Longwei Jiang<sup>1</sup>, Limin Li<sup>2\*</sup>, Shaochang Jia<sup>1\*</sup>, and Ke Zen<sup>2\*</sup>

<sup>1</sup>Bayi Clinical Medicine School, Nanjing University of Chinese Medicine, No. 34, Yanggongjing Street, Nanjing Jiangsu 210002; <sup>2</sup>State Key Laboratory of Pharmaceutical Biotechnology, Jiangsu Engineering Research Center for MicroRNA Biology and Biotechnology, Nanjing University School of Life Sciences, Nanjing, Jiangsu 210093, China

Supplementary Figure 1; Raw WB data for Fig. 5A.

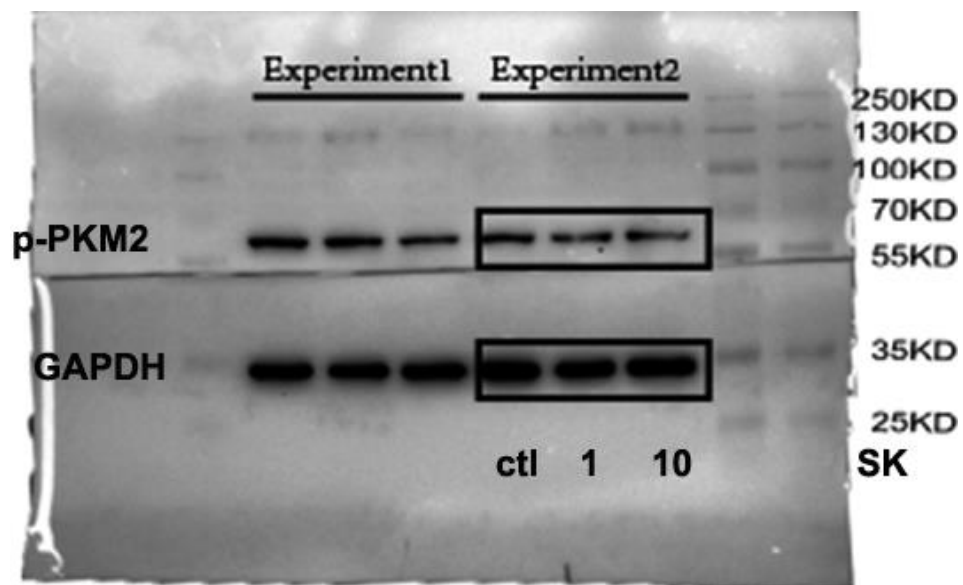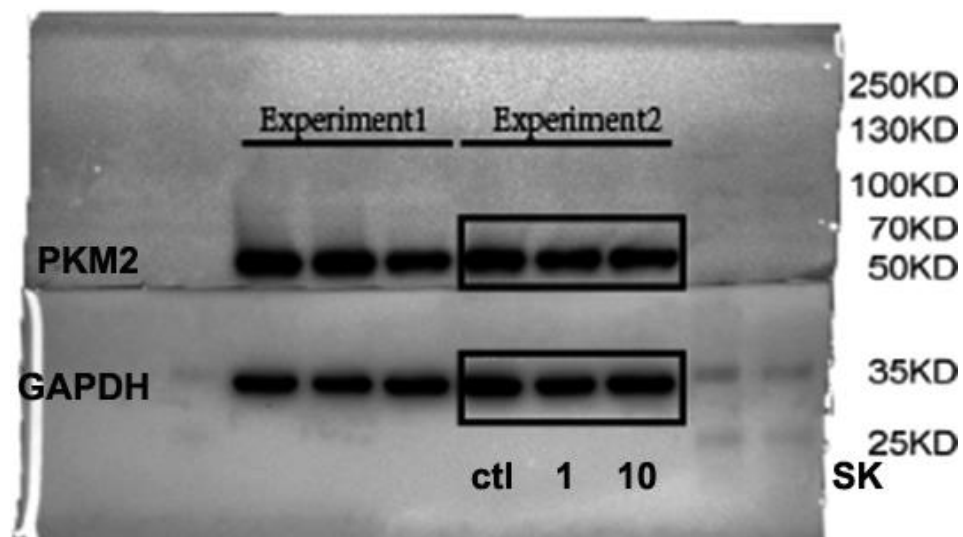

Supplement: 41598_2018_31615_MOESM1_ESM.pdf [file 41598_2018_31615_MOESM1_ESM.pdf]
